# Supplementary material for: Sensitivity to electricity – Temporal changes in Austria
Source: PubMed Central journal article supplement (PMC2562386; doi:10.1186/1471-2458-8-310), 2008-09-12
Supplement: 1471-2458-8-310-S1.pdf [file 1471-2458-8-310-S1.pdf]

**1. Wie bewerten Sie ihren Gesundheitszustand während des letzten Monats?**

|                          |                          |                          |                          |                          |
|--------------------------|--------------------------|--------------------------|--------------------------|--------------------------|
| Sehr schlecht            | Schlecht                 | Zufriedenstellend        | Gut                      | Sehr gut                 |
| <input type="checkbox"/> | <input type="checkbox"/> | <input type="checkbox"/> | <input type="checkbox"/> | <input type="checkbox"/> |

**2. Haben sie regelmäßig auftretende gesundheitliche Beschwerden unklarer Ursache?**

- Migräne     
  Wetterfühligkeit     
  Schlafstörungen     
  Kopfschmerzen  
 Andere: \_\_\_\_\_

**3. Reagieren sie allergisch/überempfindlich auf**

*(Mehrfachnennungen möglich)*

- Tiere/Tierhaare     
  Pollen/Gräser     
  Staub     
  Schimmel  
 Medikamente     
  Nahrungsmittel     
  Wasseradern     
  Kosmetika  
 Nickel     
  Amalgam (Zahnfüllung)  
 Anderes: \_\_\_\_\_

**4. Was sind Ihre Lebensgewohnheiten?**

|                                        |                          |                          |                          |
|----------------------------------------|--------------------------|--------------------------|--------------------------|
|                                        | Nie                      | Gelegentlich             | Häufig                   |
| Ernähren Sie sich gesund (biologisch)? | <input type="checkbox"/> | <input type="checkbox"/> | <input type="checkbox"/> |
| Treiben Sie Sport?                     | <input type="checkbox"/> | <input type="checkbox"/> | <input type="checkbox"/> |

|                       |                          |                          |                          |
|-----------------------|--------------------------|--------------------------|--------------------------|
|                       | Nie                      | Gelegentlich             | Regelmäßig               |
| Rauchen Sie ?         | <input type="checkbox"/> | <input type="checkbox"/> | <input type="checkbox"/> |
| Trinken Sie Alkohol ? | <input type="checkbox"/> | <input type="checkbox"/> | <input type="checkbox"/> |

**5. Benutzen Sie folgende elektrische Geräte ?**

*(Mehrfachnennungen möglich)*

|                                  |                          |                          |
|----------------------------------|--------------------------|--------------------------|
|                                  | Am Arbeitsplatz          | Im Wohnbereich           |
| PC                               | <input type="checkbox"/> | <input type="checkbox"/> |
| Überwachungsmonitor/Fernseher    | <input type="checkbox"/> | <input type="checkbox"/> |
| Mobiltelefon (Handy)             | <input type="checkbox"/> | <input type="checkbox"/> |
| Schnurlostelefon                 | <input type="checkbox"/> | <input type="checkbox"/> |
| Elektroheizung, el. Heizstrahler | <input type="checkbox"/> | <input type="checkbox"/> |
| Mikrowellenherd                  | <input type="checkbox"/> | <input type="checkbox"/> |
| Radiowecker                      | <input type="checkbox"/> | <input type="checkbox"/> |

**6. Bitte bewerten Sie folgende Aussagen:**

|                                                                                                                   |                          |                          |                          |                          |                          |
|-------------------------------------------------------------------------------------------------------------------|--------------------------|--------------------------|--------------------------|--------------------------|--------------------------|
|                                                                                                                   | Stimmt<br>völlig         | Stimmt<br>teilweise      | Weiß<br>nicht            | Eher<br>nicht            | Stimmt<br>nicht          |
| Elektrosmog kann ein Risiko für die Gesundheit darstellen.                                                        | <input type="checkbox"/> | <input type="checkbox"/> | <input type="checkbox"/> | <input type="checkbox"/> | <input type="checkbox"/> |
| Ich spüre, wenn in meiner Nähe ein Elektrogerät benützt wird.                                                     | <input type="checkbox"/> | <input type="checkbox"/> | <input type="checkbox"/> | <input type="checkbox"/> | <input type="checkbox"/> |
| Elektrosmog könnte die Symptome von Krankheiten oder Allergien verstärken.                                        | <input type="checkbox"/> | <input type="checkbox"/> | <input type="checkbox"/> | <input type="checkbox"/> | <input type="checkbox"/> |
| Für die Annehmlichkeiten der modernen Technik würde ich ein höheres Gesundheitsrisiko in Kauf nehmen.             | <input type="checkbox"/> | <input type="checkbox"/> | <input type="checkbox"/> | <input type="checkbox"/> | <input type="checkbox"/> |
| Die Gefährdung der Gesundheit durch Elektrosmog ist im Vergleich zu anderen Umwelteinflüssen zu vernachlässigen.  | <input type="checkbox"/> | <input type="checkbox"/> | <input type="checkbox"/> | <input type="checkbox"/> | <input type="checkbox"/> |
| In der Nähe von Hochspannungsleitungen oder Handymasten fühle ich in meinem Wohlbefinden gestört.                 | <input type="checkbox"/> | <input type="checkbox"/> | <input type="checkbox"/> | <input type="checkbox"/> | <input type="checkbox"/> |
| Berichte in den Medien brachten mich darauf, dass gesundheitliche Probleme Elektrosmog als Ursache haben könnten. | <input type="checkbox"/> | <input type="checkbox"/> | <input type="checkbox"/> | <input type="checkbox"/> | <input type="checkbox"/> |
| Ich habe schon aktiv nach Informationen zum Thema Elektrosmog gesucht.                                            | <input type="checkbox"/> | <input type="checkbox"/> | <input type="checkbox"/> | <input type="checkbox"/> | <input type="checkbox"/> |
| Ich habe Schlafprobleme, wenn in meiner Nähe elektrische Geräte eingeschaltet sind.                               | <input type="checkbox"/> | <input type="checkbox"/> | <input type="checkbox"/> | <input type="checkbox"/> | <input type="checkbox"/> |
| Ich habe bereits einen Arzt zum Thema Elektrosmog konsultiert.                                                    | <input type="checkbox"/> | <input type="checkbox"/> | <input type="checkbox"/> | <input type="checkbox"/> | <input type="checkbox"/> |

**7. Welche elektrischen Geräte sehen Sie als Hauptverursacher von Elektrosmog an?**

- |                                              |                                              |                                                 |                                            |
|----------------------------------------------|----------------------------------------------|-------------------------------------------------|--------------------------------------------|
| <input type="checkbox"/> Babyfon             | <input type="checkbox"/> Elektroinstallation | <input type="checkbox"/> Halogenlampen          | <input type="checkbox"/> Radiowecker       |
| <input type="checkbox"/> Bahnverkehr         | <input type="checkbox"/> Elektroverteiler    | <input type="checkbox"/> Haushaltsgeräte        | <input type="checkbox"/> Rundfunksender    |
| <input type="checkbox"/> Computer            | <input type="checkbox"/> Fernseher           | <input type="checkbox"/> Hochspannungsleitungen | <input type="checkbox"/> Schnurlostelefon  |
| <input type="checkbox"/> el. Fußbodenheizung | <input type="checkbox"/> Handy               | <input type="checkbox"/> Mikrowellenherd        | <input type="checkbox"/> Leuchtstofflampen |
| <input type="checkbox"/> el. Heizstrahler    | <input type="checkbox"/> Handymasten         | <input type="checkbox"/> Monitore               |                                            |
| <input type="checkbox"/> Sonstige: _____     |                                              |                                                 |                                            |

**8. Kennen Sie Personen, die sich durch Elektrosmog gestört fühlen?**

- Ja       Nein      Falls ja, wie viele Personen in ihrem Bekanntenkreis sind davon betroffen?      \_\_\_\_\_ Personen

**9. Fühlen Sie sich durch Elektrosmog gestört?**

|                          |                          |                          |
|--------------------------|--------------------------|--------------------------|
| Gar nicht                | Etwas                    | Stark                    |
| <input type="checkbox"/> | <input type="checkbox"/> | <input type="checkbox"/> |

**Falls ja, welche Ihrer Symptome bringen Sie mit Elektrosmog in Zusammenhang?**  
(bitte nutzen Sie die vorgesehenen Zeilen)

- # \_\_\_\_\_      # \_\_\_\_\_      # \_\_\_\_\_  
# \_\_\_\_\_      # \_\_\_\_\_      # \_\_\_\_\_

**10. Tun Sie etwas um Elektrosmog zu verringern, und falls ja, was?**

(Mehrfachantworten möglich)

- |                                                                 |                                                                        |
|-----------------------------------------------------------------|------------------------------------------------------------------------|
| <input type="checkbox"/> Benutzung von Elektrogeräten vermeiden | <input type="checkbox"/> Entstörgeräte verwenden                       |
| <input type="checkbox"/> Netzfreischalter installieren          | <input type="checkbox"/> Geräte nicht mit der Fernbedienung abschalten |
| <input type="checkbox"/> Unbenützte Geräte abstecken            |                                                                        |
| <input type="checkbox"/> Etwas anderes, und zwar: _____         |                                                                        |

**11. Falls Sie Beschwerden haben: Wie haben sie entdeckt, dass diese mit Elektrosmog zusammenhängen?**

- |                                             |                                     |                                           |                                                   |
|---------------------------------------------|-------------------------------------|-------------------------------------------|---------------------------------------------------|
| <input type="checkbox"/> Eigene Beobachtung | <input type="checkbox"/> Hörensagen | <input type="checkbox"/> Radio, Fernsehen | <input type="checkbox"/> Zeitungen, Zeitschriften |
| <input type="checkbox"/> Produktwerbung     | <input type="checkbox"/> Arzt       | <input type="checkbox"/> Anders: _____    |                                                   |

**12. Persönliche Daten**

**Alter:** \_\_\_\_\_ Jahre      **Geschlecht**       m     w      **Größe:** \_\_\_\_\_ cm      **Gewicht:** \_\_\_\_\_ kg

**13. Höchste abgeschlossene Ausbildung?**

- Pflichtschule     Lehre     Matura     Hochschule

**14. Welcher Berufsgruppe gehören Sie an?**

- |                                        |                                       |                                        |                                     |
|----------------------------------------|---------------------------------------|----------------------------------------|-------------------------------------|
| <input type="checkbox"/> Arbeitslos    | <input type="checkbox"/> Arbeiter     | <input type="checkbox"/> Hausfrau/mann | <input type="checkbox"/> Pensionist |
| <input type="checkbox"/> in Ausbildung | <input type="checkbox"/> Angestellter | <input type="checkbox"/> Selbstständig |                                     |

**15. Arbeits- bzw. Wohnort ?**

(Anleitung: bitte nach Ihrer Einschätzung ein Kreuz setzen)

**Sie wohnen**

am Land

in der Stadt

**Sie arbeiten**

am Land

in der Stadt

**Wir danken für ihre Mithilfe!**
